# Supplementary material for: Diverse Evolution in 111 Plant Genomes Reveals Purifying and Dosage Balancing Selection Models for F-Box Genes
Source: MDPI journal article supplement (doi:10.3390/ijms22020871), 2021-01-16
Supplement: s1 [file s1]

**Table S2.** Biochemical interaction analysis of CAFs with ASK1

| Subfamily    | ID            | AGI         | Known Name      | Y2H_Clone<br>(ID in (Hua, et al. 2011)) | ASK1<br>Interaction | Reference                                                                             |
|--------------|---------------|-------------|-----------------|-----------------------------------------|---------------------|---------------------------------------------------------------------------------------|
| orthoMCL0000 | AthaFBX_00557 | AT3G26810.1 | AFB2            |                                         | Y                   | (Dharmasiri, et al. 2005)                                                             |
| orthoMCL0000 | AthaFBX_00576 | AT3G62980.1 | TIR1            |                                         | Y                   | (Gray, et al. 1999; Dharmasiri, et al. 2005)                                          |
| orthoMCL0000 | AthaFBX_00617 | AT1G12820.1 | AFB3            |                                         | Y                   | (Dharmasiri, et al. 2005)                                                             |
| orthoMCL0000 | AthaFBX_00626 | AT4G03190.1 | GRH1            |                                         | Y                   | (Dharmasiri, et al. 2005)                                                             |
| orthoMCL0003 | AthaFBX_00002 | AT1G76900.1 | TLP1            |                                         | Y                   | (Kuroda, et al. 2012; Bao, et al. 2014)                                               |
| orthoMCL0003 | AthaFBX_00012 | AT1G25280.1 | TLP10           |                                         | Y                   | (Risseeuw, et al. 2003; Kuroda, et al. 2012; Bao, et al. 2014)                        |
| orthoMCL0003 | AthaFBX_00071 | AT1G43640.1 | TLP5            |                                         |                     |                                                                                       |
| orthoMCL0005 | AthaFBX_00231 | AT5G25350.1 | EBF2            |                                         | Y                   | (Guo and Ecker 2003; Potuschak, et al. 2003; Gagne, et al. 2004; Kuroda, et al. 2012) |
| orthoMCL0005 | AthaFBX_00332 | AT2G25490.1 | EBF1            |                                         | Y                   | (Guo and Ecker 2003; Potuschak, et al. 2003; Gagne, et al. 2004; Kuroda, et al. 2012) |
| orthoMCL0006 | AthaFBX_00134 | AT5G67250.1 | VFB4            |                                         | Y                   | (van den Burg, et al. 2008; Arabidopsis Interactome Mapping 2011)                     |
| orthoMCL0006 | AthaFBX_00178 | AT3G50080.1 | VFB2            |                                         | Y                   | (van den Burg, et al. 2008)                                                           |
| orthoMCL0006 | AthaFBX_00199 | AT4G07400.1 | VFB3            |                                         | Y                   | (van den Burg, et al. 2008)                                                           |
| orthoMCL0006 | AthaFBX_00409 | AT1G47056.1 | VFB1            |                                         | Y                   | (van den Burg, et al. 2008)                                                           |
| orthoMCL0007 | AthaFBX_00266 | AT5G57360.2 | ZTL             |                                         | Y                   | (Han, et al. 2004)                                                                    |
| orthoMCL0007 | AthaFBX_00448 | AT2G18915.2 | LKP2            |                                         | Y                   | (Yasuhara, et al. 2004)                                                               |
| orthoMCL0007 | AthaFBX_00578 | AT1G68050.1 | FKF1            |                                         | Y                   | (Yasuhara, et al. 2004; Arabidopsis Interactome Mapping 2011)                         |
| orthoMCL0008 | AthaFBX_00746 | AT2G02870.1 | SKIP11          | At_F0678                                | Y                   | (Risseeuw, et al. 2003; Arabidopsis Interactome Mapping 2011)                         |
| orthoMCL0008 | AthaFBX_00533 | AT1G74510.2 |                 | At_F0509                                | Y                   |                                                                                       |
| orthoMCL0008 | AthaFBX_00687 | AT1G26930.1 |                 |                                         | Y                   | (Arabidopsis Interactome Mapping 2011)                                                |
| orthoMCL0009 | AthaFBX_00587 | AT4G18380.1 |                 |                                         |                     |                                                                                       |
| orthoMCL0009 | AthaFBX_00666 | AT5G46170.1 |                 | At_F0591                                | Y                   |                                                                                       |
| orthoMCL0009 | AthaFBX_00655 | AT1G30200.2 |                 |                                         |                     |                                                                                       |
| orthoMCL0010 | AthaFBX_00219 | AT2G02240.1 | MEE66           |                                         |                     |                                                                                       |
| orthoMCL0010 | AthaFBX_00321 | AT2G02360.1 | PP2-B10         |                                         | Y                   | (Arabidopsis Interactome Mapping 2011)                                                |
| orthoMCL0010 | AthaFBX_00382 | AT2G02230.1 | SKIP21 / PP2-B1 |                                         | Y                   | (Risseeuw, et al. 2003; Kuroda, et al. 2012)                                          |

|              |               |             |                 |          |   |  |                                                                              |
|--------------|---------------|-------------|-----------------|----------|---|--|------------------------------------------------------------------------------|
| orthoMCL0010 | AthaFBX_00118 | AT2G02250.1 | PP2-B2          |          |   |  |                                                                              |
| orthoMCL0013 | AthaFBX_00620 | AT5G07670.1 |                 |          |   |  |                                                                              |
| orthoMCL0013 | AthaFBX_00648 | AT5G51380.1 |                 |          |   |  |                                                                              |
| orthoMCL0013 | AthaFBX_00629 | AT5G51370.2 |                 |          |   |  |                                                                              |
| orthoMCL0014 | AthaFBX_00434 | AT1G55270.1 | SAGL1           | At_F0445 | Y |  |                                                                              |
| orthoMCL0015 | AthaFBX_00202 | AT1G47270.1 | TLP6            |          | Y |  | (Kuroda, et al. 2012)                                                        |
| orthoMCL0015 | AthaFBX_00399 | AT2G18280.2 | TLP2            |          | Y |  | (Kuroda, et al. 2012)                                                        |
| orthoMCL0017 | AthaFBX_00615 | AT3G61060.2 | SKIP9 / PP2-A13 | At_F0468 | Y |  | (Risseeuw, et al. 2003)                                                      |
| orthoMCL0017 | AthaFBX_00599 | AT1G12710.2 | PP2-A12         | At_F0514 | Y |  | (Hua and Gao 2019)                                                           |
| orthoMCL0018 | AthaFBX_00694 | AT2G39940.1 | COI1            |          | Y |  | (Xu, et al. 2002; Takahashi, et al. 2004)                                    |
| orthoMCL0019 | AthaFBX_00189 | AT2G47900.3 | TLP3            |          | Y |  | (Kuroda, et al. 2012; Bao, et al. 2014)                                      |
| orthoMCL0020 | AthaFBX_00350 | AT2G44130.1 | KMD3            | At_F0354 | Y |  | (Kim, et al. 2013; Hua and Gao 2019)                                         |
| orthoMCL0020 | AthaFBX_00613 | AT3G59940.1 | KMD4            |          | Y |  | (Kim, et al. 2013)                                                           |
| orthoMCL0021 | AthaFBX_00400 | AT1G13570.1 |                 |          | Y |  | (Risseeuw, et al. 2003; Arabidopsis Interactome Mapping 2011)                |
| orthoMCL0023 | AthaFBX_00194 | AT2G26850.1 |                 | At_F0228 | Y |  | (Kuroda, et al. 2012)                                                        |
| orthoMCL0023 | AthaFBX_00412 | AT2G32560.1 |                 | At_F0365 | ? |  |                                                                              |
| orthoMCL0024 | AthaFBX_00250 | AT1G21410.1 | SKP2A           |          | Y |  | (Jurado, et al. 2008; Kuroda, et al. 2012)                                   |
| orthoMCL0024 | AthaFBX_00480 | AT1G77000.1 | SKP2B           |          | Y |  | (Kuroda, et al. 2012)                                                        |
| orthoMCL0025 | AthaFBX_00481 | AT3G60350.1 | ARABIDILLO-2    |          | Y |  | (Nibau, et al. 2011)                                                         |
| orthoMCL0025 | AthaFBX_00601 | AT2G44900.2 | ARABIDILLO-1    |          | Y |  | (Nibau, et al. 2011)                                                         |
| orthoMCL0027 | AthaFBX_00635 | AT4G00755.1 |                 | At_F0609 | Y |  |                                                                              |
| orthoMCL0028 | AthaFBX_00511 | AT1G57790.1 |                 |          | Y |  | (Kuroda, et al. 2012)                                                        |
| orthoMCL0028 | AthaFBX_00278 | AT3G56470.1 |                 |          |   |  |                                                                              |
| orthoMCL0028 | AthaFBX_00523 | AT4G12382.1 |                 |          |   |  |                                                                              |
| orthoMCL0030 | AthaFBX_00394 | AT1G22040.1 |                 | At_F0153 | Y |  |                                                                              |
| orthoMCL0031 | AthaFBX_00659 | AT1G80570.2 |                 |          |   |  |                                                                              |
| orthoMCL0034 | AthaFBX_00642 | AT1G80440.1 | KMD1            | At_F0564 | Y |  | (Kim, et al. 2013)                                                           |
| orthoMCL0034 | AthaFBX_00730 | AT1G15670.1 | KMD2            | At_F0656 | Y |  | (Kim, et al. 2013)                                                           |
| orthoMCL0035 | AthaFBX_00696 | AT1G67340.1 |                 | At_F0687 | Y |  |                                                                              |
| orthoMCL0036 | AthaFBX_00038 | AT3G61590.4 | HWS             |          | Y |  | (Takahashi, et al. 2004; Gonzalez-Carranza, et al. 2007)                     |
| orthoMCL0037 | AthaFBX_00639 | AT5G49980.1 | AFB5            |          | Y |  | (Prigge, et al. 2016)                                                        |
| orthoMCL0037 | AthaFBX_00649 | AT4G24390.1 | AFB4            |          | Y |  | (Prigge, et al. 2016)                                                        |
| orthoMCL0039 | AthaFBX_00704 | AT1G61340.1 | FBS1            |          | Y |  | (Arabidopsis Interactome Mapping 2011; Sepulveda-Garcia and Rocha-Sosa 2012) |
| orthoMCL0039 | AthaFBX_00668 | AT4G21510.1 | SKIP27 / FBS2   | At_F0559 | Y |  | (Risseeuw, et al. 2003)                                                      |
| orthoMCL0042 | AthaFBX_00424 | AT4G33210.1 | SLOMO           |          | Y |  | (Lohmann, et al. 2010)                                                       |
| orthoMCL0043 | AthaFBX_00604 | AT1G67480.1 |                 | At_F0482 | ? |  |                                                                              |
| orthoMCL0044 | AthaFBX_00637 | AT3G26000.1 | RIFP1           |          | Y |  | (Risseeuw, et al. 2003; Li, et al. 2016)                                     |

|              |               |             |        |          |   |                                                                                                  |
|--------------|---------------|-------------|--------|----------|---|--------------------------------------------------------------------------------------------------|
| orthoMCL0045 | AthaFBX_00509 | AT1G53320.1 | TLP7   |          | Y | (Bao, et al. 2014)                                                                               |
| orthoMCL0047 | AthaFBX_00471 | AT1G10780.2 |        | At_F0615 | Y | (Kuroda, et al. 2012)                                                                            |
| orthoMCL0048 | AthaFBX_00701 | AT5G39360.1 | EDL2   |          |   |                                                                                                  |
| orthoMCL0048 | AthaFBX_00722 | AT5G15440.1 | EDL1   |          |   | (Kim, et al. 2008;                                                                               |
| orthoMCL0049 | AthaFBX_00376 | AT3G54650.1 | FBL17  | At_F0563 | Y | Hua and Gao 2019)                                                                                |
| orthoMCL0050 | AthaFBX_00505 | AT4G08980.2 | FBW2   | At_F0505 | Y | (Kuroda, et al. 2012)                                                                            |
| orthoMCL0051 | AthaFBX_00544 | AT1G67190.2 |        | At_F0602 | Y | (Kuroda, et al. 2012)                                                                            |
| orthoMCL0052 | AthaFBX_00714 | AT2G42620.1 | MAX2   |          | Y | (Woo, et al. 2001;                                                                               |
| orthoMCL0054 | AthaFBX_00606 | AT3G63220.2 |        | At_F0557 | Y | Stirnberg, et al. 2007)                                                                          |
| orthoMCL0055 | AthaFBX_00203 | AT1G27340.1 | LCR    | At_F0313 | Y | (Risseeuw, et al. 2003)                                                                          |
| orthoMCL0056 | AthaFBX_00612 | AT4G10925.4 |        | At_F0558 | ? | (Hua and Gao 2019)                                                                               |
| orthoMCL0057 | AthaFBX_00237 | AT5G39450.1 |        | At_F0202 | Y |                                                                                                  |
| orthoMCL0057 | AthaFBX_00644 | AT5G39490.1 |        | At_F0607 | Y |                                                                                                  |
| orthoMCL0057 | AthaFBX_00677 | AT5G39460.1 |        | At_F0643 | Y |                                                                                                  |
| orthoMCL0059 | AthaFBX_00679 | AT1G31350.2 | KUF1   |          | Y | (Risseeuw, et al. 2003)                                                                          |
| orthoMCL0061 | AthaFBX_00174 | AT4G33160.2 |        | At_F0207 | Y |                                                                                                  |
| orthoMCL0063 | AthaFBX_00512 | AT1G23390.1 | KFB    | At_F0500 | Y | (Kuroda, et al. 2012; Zhang, et al. 2013; Hua and Gao 2019)                                      |
| orthoMCL0065 | AthaFBX_00699 | AT2G27310.1 |        |          |   |                                                                                                  |
| orthoMCL0066 | AthaFBX_00293 | AT4G24210.1 | SLY1   |          | Y | (Fu, et al. 2004)                                                                                |
| orthoMCL0067 | AthaFBX_00619 | AT5G04010.1 |        | At_F0612 | Y |                                                                                                  |
| orthoMCL0068 | AthaFBX_00614 | AT5G60570.2 |        | At_F0575 | Y |                                                                                                  |
| orthoMCL0069 | AthaFBX_00137 | AT5G45360.1 | SKIP31 | At_F0211 | Y | (Risseeuw, et al. 2003; Kuroda, et al. 2012)                                                     |
| orthoMCL0070 | AthaFBX_00285 | AT5G48170.1 | SLY2   |          | Y | (Fu, et al. 2004)                                                                                |
| orthoMCL0071 | AthaFBX_00213 | AT1G23780.1 | SKIP22 | At_F0283 | Y | (Risseeuw, et al. 2003; Kuroda, et al. 2012)                                                     |
| orthoMCL0074 | AthaFBX_00586 | AT4G02440.1 | EID1   |          | Y | (Dieterle, et al. 2001; Risseeuw, et al. 2003; Arabidopsis Interactome Mapping 2011)             |
| orthoMCL0075 | AthaFBX_00031 | AT1G21760.1 | FBP7   | At_F0001 | Y | (Risseeuw, et al. 2003; Calderon-Villalobos, et al. 2007; Kuroda, et al. 2012; Hua and Gao 2019) |
| orthoMCL0077 | AthaFBX_00377 | AT1G70590.1 |        | At_F0469 | Y | (Kuroda, et al. 2012)                                                                            |
| orthoMCL0078 | AthaFBX_00553 | AT1G30090.1 | DIF    | At_F0466 | Y | (Hua and Gao 2019)                                                                               |
| orthoMCL0080 | AthaFBX_00245 | AT5G15710.2 |        | At_F0190 | Y | (Kuroda, et al. 2012)                                                                            |
| orthoMCL0081 | AthaFBX_00403 | AT5G21040.2 | FBX2   |          | Y | (Kuroda, et al. 2012)                                                                            |
| orthoMCL0083 | AthaFBX_00744 | AT4G35930.3 | FBS4   | At_F0709 | Y | (Hua and Gao 2019)                                                                               |
| orthoMCL0085 | AthaFBX_00729 | AT1G06110.1 | SKIP16 | At_F0664 | Y | (Hua and Gao 2019)                                                                               |
| orthoMCL0086 | AthaFBX_00146 | AT5G42350.1 | CFK1   | At_F0220 | Y | (Hua and Gao 2019)                                                                               |
| orthoMCL0086 | AthaFBX_00149 | AT5G42360.1 | CFK2   |          |   |                                                                                                  |
| orthoMCL0088 | AthaFBX_00393 | AT1G51550.1 |        | At_F0357 | Y | (Kuroda, et al. 2012)                                                                            |

|              |               |             |         |          |   |  |                                                                                 |
|--------------|---------------|-------------|---------|----------|---|--|---------------------------------------------------------------------------------|
| orthoMCL0090 | AthaFBX_00521 | AT1G78280.1 |         |          |   |  |                                                                                 |
| orthoMCL0091 | AthaFBX_00380 | AT5G56180.1 | ARP8    | At_F0323 | Y |  |                                                                                 |
| orthoMCL0092 | AthaFBX_00345 | AT3G61350.2 | SKIP4   | At_F0437 | Y |  | (Hua and Gao 2019)                                                              |
| orthoMCL0093 | AthaFBX_00570 | AT1G55000.1 |         | At_F0510 | Y |  | (Arabidopsis Interactome Mapping 2011)                                          |
| orthoMCL0094 | AthaFBX_00478 | AT3G54460.1 |         |          |   |  |                                                                                 |
| orthoMCL0095 | AthaFBX_00561 | AT5G67140.1 |         |          | Y |  | (Kuroda, et al. 2012)                                                           |
| orthoMCL0096 | AthaFBX_00191 | AT3G54480.1 | SKIP5   | At_F0362 | Y |  | (Kuroda, et al. 2012)                                                           |
| orthoMCL0097 | AthaFBX_00698 | AT5G36000.1 |         |          |   |  |                                                                                 |
| orthoMCL0097 | AthaFBX_00705 | AT3G61730.1 | RMF     |          | Y |  | (Kim, et al. 2010)                                                              |
| orthoMCL0098 | AthaFBX_00379 | AT1G30950.1 | UFO     | At_F0267 | Y |  | (Durfee, et al. 2003; Kuroda, et al. 2012; Hua and Gao 2019)                    |
| orthoMCL0099 | AthaFBX_00715 | AT5G23340.1 |         |          |   |  |                                                                                 |
| orthoMCL0100 | AthaFBX_00132 | AT4G05460.1 | SKIP19  |          | Y |  | (Kuroda, et al. 2012)                                                           |
| orthoMCL0102 | AthaFBX_00695 | AT5G40470.1 |         |          |   |  |                                                                                 |
| orthoMCL0103 | AthaFBX_00342 | AT3G52030.1 |         | At_F0264 | Y |  | (Kuroda, et al. 2012)                                                           |
| orthoMCL0104 | AthaFBX_00690 | AT5G57900.1 | SKIP1   |          | Y |  | (Risseeuw, et al. 2003)                                                         |
| orthoMCL0105 | AthaFBX_00624 | AT5G06550.1 | JMJ22   | At_F0649 | Y |  | (Hua and Gao 2019)                                                              |
| orthoMCL0106 | AthaFBX_00580 | AT4G03030.1 |         | At_F0553 | Y |  |                                                                                 |
| orthoMCL0110 | AthaFBX_00467 | AT3G48880.3 | SNIPER4 | At_F0538 | Y |  | (Arabidopsis Interactome Mapping 2011; Kuroda, et al. 2012; Huang, et al. 2018) |
| orthoMCL0114 | AthaFBX_00406 | AT5G39250.1 |         | At_F0541 | Y |  | (Kuroda, et al. 2012)                                                           |
| orthoMCL0117 | AthaFBX_00674 | AT2G36090.1 |         | At_F0667 | Y |  |                                                                                 |
| orthoMCL0118 | AthaFBX_00057 | AT5G52880.1 |         | At_F0108 | Y |  | (Kuroda, et al. 2012)                                                           |
| orthoMCL0119 | AthaFBX_00459 | AT4G15475.1 | RAD7B   |          |   |  |                                                                                 |
| orthoMCL0120 | AthaFBX_00466 | AT3G12350.1 |         | At_F0409 | Y |  |                                                                                 |
| orthoMCL0121 | AthaFBX_00652 | AT2G01620.1 | MEE11   | At_F0710 | Y |  | (Risseeuw, et al. 2003; Arabidopsis Interactome Mapping 2011; Hua and Gao 2019) |
| orthoMCL0123 | AthaFBX_00284 | AT2G17020.1 |         |          | Y |  | (Kuroda, et al. 2012)                                                           |
| orthoMCL0126 | AthaFBX_00532 | AT2G21950.1 | SKIP6   |          | Y |  | (Risseeuw, et al. 2003)                                                         |
| orthoMCL0127 | AthaFBX_00158 | AT1G76920.1 |         |          |   |  |                                                                                 |
| orthoMCL0131 | AthaFBX_00708 | AT3G20270.3 |         |          |   |  |                                                                                 |
| orthoMCL0136 | AthaFBX_00750 | AT1G08710.2 | SKIP24  |          | Y |  | (Risseeuw, et al. 2003)                                                         |
| orthoMCL0138 | AthaFBX_00159 | AT5G26960.1 |         | At_F0182 | Y |  |                                                                                 |
| orthoMCL0144 | AthaFBX_00691 | AT3G07550.2 |         | At_F0647 | Y |  |                                                                                 |
| orthoMCL0145 | AthaFBX_00638 | AT5G19970.1 |         |          |   |  |                                                                                 |

## References

- Arabidopsis Interactome Mapping Consortium. 2011. Evidence for network evolution in an Arabidopsis interactome map. *Science* 333:601-607.
- Bao Y, Song WM, Jin YL, Jiang CM, Yang Y, Li B, Huang WJ, Liu H, Zhang HX. 2014. Characterization of Arabidopsis Tubby-like proteins and redundant function of AtTLP3 and AtTLP9 in plant response to ABA and osmotic stress. *Plant Mol Biol* 86:471-483.

- Calderon-Villalobos LI, Nill C, Marrocco K, Kretsch T, Schwechheimer C. 2007. The evolutionarily conserved *Arabidopsis thaliana* F-box protein AtFBP7 is required for efficient translation during temperature stress. *Gene* 392:106-116.
- Dharmasiri N, Dharmasiri S, Weijers D, Lechner E, Yamada M, Hobbie L, Ehrismann JS, Jurgens G, Estelle M. 2005. Plant development is regulated by a family of auxin receptor F box proteins. *Dev Cell* 9:109-119.
- Dieterle M, Zhou YC, Schafer E, Funk M, Kretsch T. 2001. EID1, an F-box protein involved in phytochrome A-specific light signaling. *Genes Dev* 15:939-944.
- Durfee T, Roe JL, Sessions RA, Inouye C, Serikawa K, Feldmann KA, Weigel D, Zambryski PC. 2003. The F-box-containing protein UFO and AGAMOUS participate in antagonistic pathways governing early petal development in *Arabidopsis*. *Proc Natl Acad Sci U S A* 100:8571-8576.
- Fu X, Richards DE, Fleck B, Xie D, Burton N, Harberd NP. 2004. The *Arabidopsis* mutant *sleepy1gar2-1* protein promotes plant growth by increasing the affinity of the SCF<sup>SLY1</sup> E3 ubiquitin ligase for DELLA protein substrates. *Plant Cell* 16:1406-1418.
- Gagne JM, Smalle J, Gingerich DJ, Walker JM, Yoo SD, Yanagisawa S, Vierstra RD. 2004. *Arabidopsis* EIN3-binding F-box 1 and 2 form ubiquitin-protein ligases that repress ethylene action and promote growth by directing EIN3 degradation. *Proc Natl Acad Sci U S A* 101:6803-6808.
- Gonzalez-Carranza ZH, Rompa U, Peters JL, Bhatt AM, Wagstaff C, Stead AD, Roberts JA. 2007. Hawaiian skirt: an F-box gene that regulates organ fusion and growth in *Arabidopsis*. *Plant Physiol* 144:1370-1382.
- Gray WM, del Pozo JC, Walker L, Hobbie L, Risseuw E, Banks T, Crosby WL, Yang M, Ma H, Estelle M. 1999. Identification of an SCF ubiquitin-ligase complex required for auxin response in *Arabidopsis thaliana*. *Genes Dev* 13:1678-1691.
- Guo H, Ecker JR. 2003. Plant responses to ethylene gas are mediated by SCF<sup>EBF1/EBF2</sup>-dependent proteolysis of EIN3 transcription factor. *Cell* 115:667-677.
- Han L, Mason M, Risseuw EP, Crosby WL, Somers DE. 2004. Formation of an SCF(ZTL) complex is required for proper regulation of circadian timing. *Plant J* 40:291-301.
- Hua Z, Gao Z. 2019. Adaptive and degenerative evolution of the S-Phase Kinase-Associated Protein 1-Like family in *Arabidopsis thaliana*. *PeerJ* 7:e6740.
- Hua Z, Zou C, Shiu SH, Vierstra RD. 2011. Phylogenetic comparison of *F-Box (FBX)* gene superfamily within the plant kingdom reveals divergent evolutionary histories indicative of genomic drift. *PLoS One* 6:e16219.
- Huang J, Zhu C, Li X. 2018. SCF(SNIPER4) controls the turnover of two redundant TRAF proteins in plant immunity. *Plant J* 95:504-515.
- Jurado S, Diaz-Trivino S, Abraham Z, Manzano C, Gutierrez C, del Pozo C. 2008. SKP2A, an F-box protein that regulates cell division, is degraded via the ubiquitin pathway. *Plant J* 53:828-841.
- Kim HJ, Chiang YH, Kieber JJ, Schaller GE. 2013. SCF(KMD) controls cytokinin signaling by regulating the degradation of type-B response regulators. *Proc Natl Acad Sci U S A* 110:10028-10033.
- Kim HJ, Oh SA, Brownfield L, Hong SH, Ryu H, Hwang I, Twell D, Nam HG. 2008. Control of plant germline proliferation by SCF<sup>FB17</sup> degradation of cell cycle inhibitors. *Nature* 455:1134-1137.
- Kim OK, Jung JH, Park CM. 2010. An *Arabidopsis* F-box protein regulates tapetum degeneration and pollen maturation during anther development. *Planta* 232:353-366.
- Kuroda H, Yanagawa Y, Takahashi N, Horii Y, Matsui M. 2012. A comprehensive analysis of interaction and localization of *Arabidopsis* SKP1-like (ASK) and F-box (FBX) proteins. *PLoS One* 7:e50009.

- Li Y, Zhang L, Li D, Liu Z, Wang J, Li X, Yang Y. 2016. The Arabidopsis F-box E3 ligase RIFP1 plays a negative role in abscisic acid signalling by facilitating ABA receptor RCAR3 degradation. *Plant Cell Environ* 39:571-582.
- Lohmann D, Stacey N, Breuninger H, Jikumaru Y, Muller D, Sicard A, Leyser O, Yamaguchi S, Lenhard M. 2010. SLOW MOTION is required for within-plant auxin homeostasis and normal timing of lateral organ initiation at the shoot meristem in Arabidopsis. *Plant Cell* 22:335-348.
- Nibau C, Gibbs DJ, Bunting KA, Moody LA, Smiles EJ, Tubby JA, Bradshaw SJ, Coates JC. 2011. ARABIDILLO proteins have a novel and conserved domain structure important for the regulation of their stability. *Plant Mol Biol* 75:77-92.
- Potuschak T, Lechner E, Parmentier Y, Yanagisawa S, Grava S, Koncz C, Genschik P. 2003. EIN3-dependent regulation of plant ethylene hormone signaling by two arabidopsis F box proteins: EBF1 and EBF2. *Cell* 115:679-689.
- Prigge MJ, Greenham K, Zhang Y, Santner A, Castillejo C, Mutka AM, O'Malley RC, Ecker JR, Kunkel BN, Estelle M. 2016. The Arabidopsis auxin receptor F-box proteins AFB4 and AFB5 are required for response to the synthetic auxin picloram. *G3 (Bethesda)* 6:1383-1390.
- Risseeuw EP, Daskalchuk TE, Banks TW, Liu E, Cotelesage J, Hellmann H, Estelle M, Somers DE, Crosby WL. 2003. Protein interaction analysis of SCF ubiquitin E3 ligase subunits from Arabidopsis. *Plant J* 34:753-767.
- Sepulveda-Garcia E, Rocha-Sosa M. 2012. The Arabidopsis F-box protein AtFBS1 interacts with 14-3-3 proteins. *Plant Sci* 195:36-47.
- Stirnberg P, Furner IJ, Ottoline Leyser HM. 2007. MAX2 participates in an SCF complex which acts locally at the node to suppress shoot branching. *Plant J* 50:80-94.
- Takahashi N, Kuroda H, Kuromori T, Hirayama T, Seki M, Shinozaki K, Shimada H, Matsui M. 2004. Expression and interaction analysis of Arabidopsis Skp1-related genes. *Plant Cell Physiol* 45:83-91.
- van den Burg HA, Tsitsigiannis DI, Rowland O, Lo J, Rallapalli G, Maclean D, Takken FL, Jones JD. 2008. The F-box protein ACRE189/ACIF1 regulates cell death and defense responses activated during pathogen recognition in tobacco and tomato. *Plant Cell* 20:697-719.
- Woo HR, Chung KM, Park JH, Oh SA, Ahn T, Hong SH, Jang SK, Nam HG. 2001. ORE9, an F-box protein that regulates leaf senescence in Arabidopsis. *Plant Cell* 13:1779-1790.
- Xu L, Liu F, Lechner E, Genschik P, Crosby WL, Ma H, Peng W, Huang D, Xie D. 2002. The SCF(COI1) ubiquitin-ligase complexes are required for jasmonate response in Arabidopsis. *Plant Cell* 14:1919-1935.
- Yasuhara M, Mitsui S, Hirano H, Takanabe R, Tokioka Y, Ihara N, Komatsu A, Seki M, Shinozaki K, Kiyosue T. 2004. Identification of ASK and clock-associated proteins as molecular partners of LKP2 (LOV kelch protein 2) in Arabidopsis. *J Exp Bot* 55:2015-2027.
- Zhang X, Gou M, Liu CJ. 2013. Arabidopsis Kelch repeat F-box proteins regulate phenylpropanoid biosynthesis via controlling the turnover of phenylalanine ammonia-lyase. *Plant Cell* 25:4994-5010.
